# Supplementary material
Source: publisher site journal article supplement (https://www.dovepress.com/article/389358)
Supplement: Supplementary file 1 [file get_supplementary_file.php]

**Identification of studies via other methods**

**Identification of studies via databases and registers**

Records identified from Databases (n = 546):

Ovid MEDLINE (n = 229)

EMBASE (n = 82)

Google Scholar (n = 26)

SCOPUS (n = 24)

CENTRAL (n = 1)

APA PyschINFO (n = 1)

Registers (n = 0)

Records identified from:

Websites (n = 6)

Organisations (n = 9)

Citation searching (n = 1)

etc.

Records removed *before screening*:

Duplicate records removed (n = 107)

Records marked as ineligible by automation tools (n = 0)

Records removed for other reasons (n = 0)

**Identification**

Records screened

(n = 439)

Records excluded**

(n = 269)

Reports not retrieved

(n = 5)

Reports sought for retrieval

(n = 11)

Reports sought for retrieval

(n = 170)

Reports not retrieved

(n = 66)

**Screening**

Reports excluded (n=95):

No definition of opioid stewardship was given (n = 69)

No full text was found (n = 17)

Conference abstract (n = 9)

Reports assessed for eligibility

(n = 11)

Reports excluded:

Duplicate (n=1)

Reports assessed for eligibility

(n = 104)

Studies included in review

(n = 9)

Reports of included studies

(n = 10)

**Included**

*Consider, if feasible to do so, reporting the number of records identified from each database or register searched (rather than the total number across all databases/registers).

**If automation tools were used, indicate how many records were excluded by a human and how many were excluded by automation tools.

*From:*  Page MJ, McKenzie JE, Bossuyt PM, Boutron I, Hoffmann TC, Mulrow CD, et al. The PRISMA 2020 statement: an updated guideline for reporting systematic reviews. BMJ 2021;372:n71. doi: 10.1136/bmj.n71. For more information, visit: <http://www.prisma-statement.org/>
